# Supplementary material for: Drought-induced site-specific DNA methylation and its association with drought tolerance in rice (Oryza sativa L.)
Source: PubMed Central journal article supplement — J Exp Bot. 2010 Dec 30;62(6):1951–60. doi: 10.1093/jxb/erq391 (PMC3060682; doi:10.1093/jxb/erq391), 2010-12-30
Supplement: supp_erq391_00052597-file001.pdf [file supp_erq391_00052597-file001.pdf]

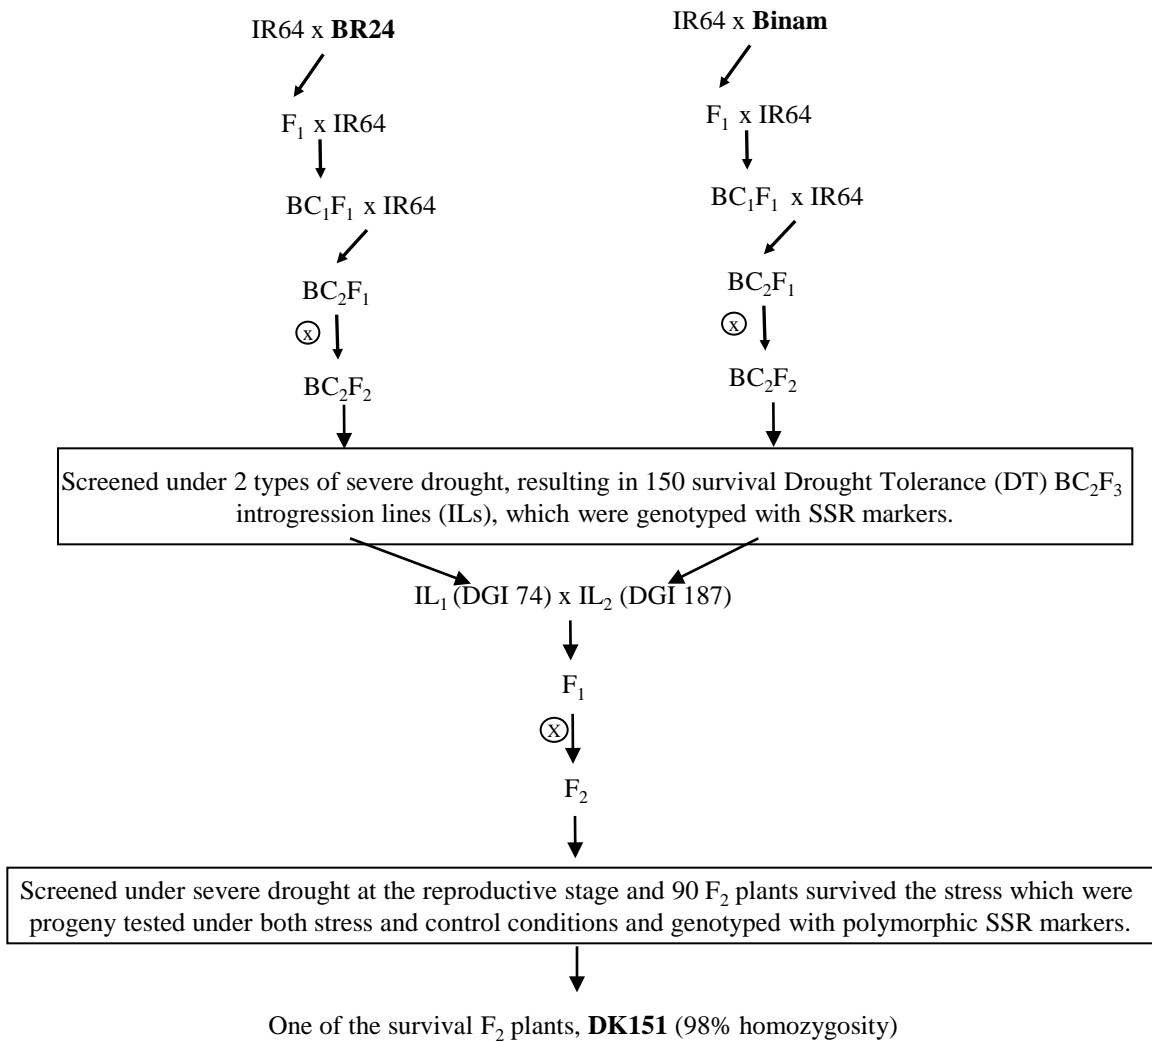

**Fig. S1.** The BC breeding and intercross procedures for developing drought tolerant introgression lines (DGI 74 and DGI187) and the pyramiding line, DK151 using IR64 (the recipient) and 2 donors, BR24 and Binam. The two types of drought stress for screening the BC<sub>2</sub> populations included the lowland drought at the reproductive stage and the chronic drought under the upland conditions (Lafitte et al. 2006).

**Table S1. Adapter and Primer Sequences**

| Adapter and Primer       | <i>EcoR</i> I               | <i>Hpa</i> II/ <i>Msp</i> I  |
|--------------------------|-----------------------------|------------------------------|
| Adapter 1                | 5'-CTCGTAGACTGCGTACC-3'     | 5'-GACGATGAGTCTAGA A-3'      |
| Adapter 2                | 5'-AATTGGTACGCAGTCTAC-3'    | 5'-CGTTCTAGACTCATC-3'        |
| Pre-Amplification Primer | 5'-GACTGCGTACCAATTCA-3'(E1) | 5'-GATGAGTCTAGAACGGT-3'(HM1) |
| Selective Primer         | E1+TA(E01)                  | HM1+AA(HM31)                 |
|                          | E1+TG(E02)                  | HM1+AG(HM32)                 |
|                          | E1+TC(E03)                  | HM1+AC(HM33)                 |
|                          | E1+GA(E04)                  | HM1+AT(HM34)                 |
|                          | E1+GC(E05)                  | HM1+GA(HM35)                 |
|                          | E1+GT(E06)                  | HM1+GT(HM36)                 |
|                          | E1+CA(E07)                  | HM1+GG(HM37)                 |
|                          | E1+CG(E08)                  | HM1+GC(HM38)                 |
|                          | E1+CT(E09)                  | HM1+CA(HM39)                 |
|                          | E1+CC(E10)                  | HM1+CT(HM310)                |
|                          |                             | HM1+CG(HM311)                |
|                          |                             | HM1+CC(HM312)                |
|                          |                             | HM1+TA(HM313)                |
|                          |                             | HM1+TG(HM314)                |
|                          |                             | HM1+TC(HM315)                |
|                          |                             | HM1+TT(HM316)                |

**Table S2.** Alteration of DNA methylation pattern of DK151 and IR64 under 3 water conditions

| Band Pattern | Control |   | Stress |   | Recovery |   | DNA methylation pattern |             |             | Tillering stage |       |      |      | Booting stage |      | Heading stage |      |
|--------------|---------|---|--------|---|----------|---|-------------------------|-------------|-------------|-----------------|-------|------|------|---------------|------|---------------|------|
|              | H       | M | H      | M | H        | M | Control                 | Stress      | Recovery    | Leaf            | Root  | Leaf | Root | Leaf          | Leaf | Leaf          | Leaf |
|              |         |   |        |   |          |   |                         |             |             | DK151           | DK151 | IR64 | IR64 | DK151         | IR64 | DK151         | IR64 |
| a1           | -       | - | +      | + | -        | - | <u>CCGG</u>             | CCGG        | <u>CCGG</u> | 11              | 12    | 10   | 16   | 0             | 0    | 23            | 0    |
|              |         |   |        |   |          |   | <u>GGCC</u>             | GGCC        | <u>GGCC</u> |                 |       |      |      |               |      |               |      |
| a2           | -       | - | -      | + | -        | - | <u>CCGG</u>             | <u>CCGG</u> | <u>CCGG</u> | 2               | 10    | 0    | 10   | 0             | 0    | 2             | 0    |
|              |         |   |        |   |          |   | <u>GGCC</u>             | GGCC        | <u>GGCC</u> |                 |       |      |      |               |      |               |      |
| a3           | -       | - | +      | - | -        | - | <u>CCGG</u>             | <u>CCGG</u> | <u>CCGG</u> | 61              | 60    | 60   | 44   | 6             | 5    | 4             | 6    |
|              |         |   |        |   |          |   | <u>GGCC</u>             | GGCC        | <u>GGCC</u> |                 |       |      |      |               |      |               |      |
| a4           | -       | + | +      | + | -        | + | <u>CCGG</u>             | CCGG        | <u>CCGG</u> | 4               | 6     | 4    | 5    | 0             | 3    | 2             | 2    |
|              |         |   |        |   |          |   | <u>GGCC</u>             | GGCC        | <u>GGCC</u> |                 |       |      |      |               |      |               |      |
| a5           | +       | - | +      | + | +        | - | <u>CCGG</u>             | CCGG        | <u>CCGG</u> | 1               | 0     | 1    | 0    | 0             | 0    | 0             | 0    |
|              |         |   |        |   |          |   | <u>GGCC</u>             | GGCC        | <u>GGCC</u> |                 |       |      |      |               |      |               |      |
| b1           | -       | - | +      | + | +        | + | <u>CCGG</u>             | CCGG        | CCGG        | 0               | 10    | 0    | 10   | 0             | 0    | 0             | 0    |
|              |         |   |        |   |          |   | <u>GGCC</u>             | GGCC        | <u>GGCC</u> |                 |       |      |      |               |      |               |      |
| b2           | -       | - | -      | + | -        | + | <u>CCGG</u>             | <u>CCGG</u> | <u>CCGG</u> | 1               | 2     | 0    | 4    | 0             | 0    | 0             | 0    |
|              |         |   |        |   |          |   | <u>GGCC</u>             | GGCC        | <u>GGCC</u> |                 |       |      |      |               |      |               |      |
| b3           | -       | - | +      | - | +        | - | <u>CCGG</u>             | <u>CCGG</u> | <u>CCGG</u> | 11              | 7     | 10   | 9    | 0             | 0    | 0             | 1    |
|              |         |   |        |   |          |   | <u>GGCC</u>             | GGCC        | <u>GGCC</u> |                 |       |      |      |               |      |               |      |
| b4           | -       | + | +      | + | +        | + | <u>CCGG</u>             | CCGG        | CCGG        | 11              | 4     | 16   | 4    | 0             | 0    | 0             | 0    |
|              |         |   |        |   |          |   | <u>GGCC</u>             | GGCC        | <u>GGCC</u> |                 |       |      |      |               |      |               |      |
| c1           | -       | - | +      | + | -        | + | <u>CCGG</u>             | CCGG        | <u>CCGG</u> | 0               | 0     | 0    | 3    | 0             | 0    | 0             | 0    |
|              |         |   |        |   |          |   | <u>GGCC</u>             | GGCC        | <u>GGCC</u> |                 |       |      |      |               |      |               |      |
| c2           | -       | - | +      | + | +        | - | <u>CCGG</u>             | CCGG        | <u>CCGG</u> | 0               | 0     | 0    | 2    | 0             | 0    | 0             | 0    |

|    |   |   |   |   |   |   |             |             |             |   |    |   |   |   |   |    |   |
|----|---|---|---|---|---|---|-------------|-------------|-------------|---|----|---|---|---|---|----|---|
|    |   |   |   |   |   |   | <u>GGCC</u> | GGCC        | GGCC        |   |    |   |   |   |   |    |   |
| c3 | - | + | + | + | - | - | <u>CCGG</u> | CCGG        | <u>CCGG</u> | 0 | 1  | 0 | 1 | 0 | 0 | 0  | 0 |
|    |   |   |   |   |   |   | <u>GGCC</u> | GGCC        | <u>GGCC</u> |   |    |   |   |   |   |    |   |
| c4 | + | - | + | + | - | - | <u>CCGG</u> | CCGG        | <u>CCGG</u> | 0 | 1  | 0 | 1 | 0 | 0 | 0  | 0 |
|    |   |   |   |   |   |   | <u>GGCC</u> | GGCC        | <u>GGCC</u> |   |    |   |   |   |   |    |   |
| d1 | + | + | - | + | + | + | CCGG        | <u>CCGG</u> | CCGG        | 3 | 7  | 4 | 1 | 1 | 1 | 2  | 1 |
|    |   |   |   |   |   |   | <u>GGCC</u> | <u>GGCC</u> | GGCC        |   |    |   |   |   |   |    |   |
| d2 | + | - | - | - | + | - | <u>CCGG</u> | <u>GGCC</u> | <u>CCGG</u> | 5 | 5  | 6 | 2 | 2 | 4 | 2  | 1 |
|    |   |   |   |   |   |   | <u>GGCC</u> | <u>CCGG</u> | GGCC        |   |    |   |   |   |   |    |   |
| d3 | + | + | - | - | + | + | CCGG        | <u>GGCC</u> | CCGG        | 1 | 7  | 0 | 5 | 0 | 0 | 10 | 0 |
|    |   |   |   |   |   |   | <u>GGCC</u> | <u>CCGG</u> | GGCC        |   |    |   |   |   |   |    |   |
| d4 | - | + | - | - | - | + | <u>CCGG</u> | <u>GGCC</u> | <u>CCGG</u> | 2 | 1  | 2 | 0 | 0 | 0 | 4  | 0 |
|    |   |   |   |   |   |   | <u>GGCC</u> | <u>CCGG</u> | <u>GGCC</u> |   |    |   |   |   |   |    |   |
| e1 | + | - | - | - | - | - | <u>CCGG</u> | <u>GGCC</u> | <u>GGCC</u> | 5 | 6  | 8 | 5 | 0 | 0 | 1  | 2 |
|    |   |   |   |   |   |   | <u>GGCC</u> | <u>CCGG</u> | <u>CCGG</u> |   |    |   |   |   |   |    |   |
| e2 | + | + | - | - | - | - | CCGG        | <u>GGCC</u> | <u>GGCC</u> | 0 | 3  | 1 | 6 | 0 | 0 | 2  | 0 |
|    |   |   |   |   |   |   | <u>GGCC</u> | <u>CCGG</u> | <u>CCGG</u> |   |    |   |   |   |   |    |   |
| e3 | - | + | - | - | - | - | <u>CCGG</u> | <u>GGCC</u> | <u>GGCC</u> | 1 | 2  | 0 | 1 | 1 | 0 | 0  | 0 |
|    |   |   |   |   |   |   | <u>GGCC</u> | <u>CCGG</u> | <u>CCGG</u> |   |    |   |   |   |   |    |   |
| e4 | + | + | - | + | - | + | CCGG        | <u>CCGG</u> | <u>CCGG</u> | 5 | 10 | 1 | 1 | 1 | 0 | 0  | 0 |
|    |   |   |   |   |   |   | <u>GGCC</u> | <u>GGCC</u> | <u>GGCC</u> |   |    |   |   |   |   |    |   |
| f1 | + | + | - | - | + | - | CCGG        | <u>GGCC</u> | <u>CCGG</u> | 0 | 0  | 0 | 1 | 0 | 0 | 0  | 0 |
|    |   |   |   |   |   |   | <u>GGCC</u> | <u>CCGG</u> | GGCC        |   |    |   |   |   |   |    |   |
| f2 | + | + | - | - | - | + | CCGG        | <u>GGCC</u> | <u>CCGG</u> | 0 | 1  | 0 | 0 | 0 | 0 | 0  | 0 |
|    |   |   |   |   |   |   | <u>GGCC</u> | <u>CCGG</u> | <u>GGCC</u> |   |    |   |   |   |   |    |   |

|    |   |   |   |   |   |   |             |             |             |     |     |     |     |     |     |     |     |
|----|---|---|---|---|---|---|-------------|-------------|-------------|-----|-----|-----|-----|-----|-----|-----|-----|
| f3 | + | - | - | - | + | + | <u>CCGG</u> | <u>GGCC</u> | <u>CCGG</u> | 0   | 3   | 1   | 3   | 0   | 0   | 0   | 0   |
|    |   |   |   |   |   |   | <u>GGCC</u> | <u>CCGG</u> | <u>GGCC</u> |     |     |     |     |     |     |     |     |
| g1 | + | + | + | + | + | - | <u>CCGG</u> | <u>CCGG</u> | <u>CCGG</u> | 0   | 0   | 1   | 0   | 0   | 0   | 0   | 0   |
|    |   |   |   |   |   |   | <u>GGCC</u> | <u>GGCC</u> | <u>GGCC</u> |     |     |     |     |     |     |     |     |
| g2 | + | + | + | + | - | - | <u>CCGG</u> | <u>CCGG</u> | <u>CCGG</u> | 1   | 2   | 0   | 2   | 0   | 0   | 0   | 0   |
|    |   |   |   |   |   |   | <u>GGCC</u> | <u>GGCC</u> | <u>GGCC</u> |     |     |     |     |     |     |     |     |
| g3 | + | - | + | - | - | - | <u>CCGG</u> | <u>CCGG</u> | <u>CCGG</u> | 6   | 3   | 2   | 1   | 1   | 0   | 0   | 0   |
|    |   |   |   |   |   |   | <u>GGCC</u> | <u>GGCC</u> | <u>GGCC</u> |     |     |     |     |     |     |     |     |
| g4 | - | - | - | - | + | + | <u>CCGG</u> | <u>CCGG</u> | <u>CCGG</u> | 7   | 13  | 7   | 15  | 0   | 0   | 0   | 0   |
|    |   |   |   |   |   |   | <u>GGCC</u> | <u>GGCC</u> | <u>GGCC</u> |     |     |     |     |     |     |     |     |
| g5 | - | - | - | - | + | - | <u>CCGG</u> | <u>CCGG</u> | <u>CCGG</u> | 3   | 1   | 3   | 5   | 4   | 3   | 1   | 0   |
|    |   |   |   |   |   |   | <u>GGCC</u> | <u>GGCC</u> | <u>GGCC</u> |     |     |     |     |     |     |     |     |
| g6 | + | - | + | - | + | + | <u>CCGG</u> | <u>CCGG</u> | <u>CCGG</u> | 0   | 1   | 1   | 1   | 0   | 0   | 0   | 0   |
|    |   |   |   |   |   |   | <u>GGCC</u> | <u>GGCC</u> | <u>GGCC</u> |     |     |     |     |     |     |     |     |
| g7 | - | + | - | + | + | + | <u>CCGG</u> | <u>CCGG</u> | <u>CCGG</u> | 18  | 6   | 14  | 1   | 2   | 0   | 0   | 0   |
|    |   |   |   |   |   |   | <u>GGCC</u> | <u>GGCC</u> | <u>GGCC</u> |     |     |     |     |     |     |     |     |
| g8 | - | - | - | - | - | + | <u>CCGG</u> | <u>CCGG</u> | <u>CCGG</u> | 2   | 2   | 3   | 1   | 0   | 0   | 0   | 0   |
|    |   |   |   |   |   |   | <u>GGCC</u> | <u>GGCC</u> | <u>GGCC</u> |     |     |     |     |     |     |     |     |
| h1 | + | - | + | - | + | - | <u>CCGG</u> | <u>CCGG</u> | <u>CCGG</u> | 21  | 9   | 19  | 10  | 76  | 74  | 78  | 74  |
|    |   |   |   |   |   |   | <u>GGCC</u> | <u>GGCC</u> | <u>GGCC</u> |     |     |     |     |     |     |     |     |
| h2 | - | + | - | + | - | + | <u>CCGG</u> | <u>CCGG</u> | <u>CCGG</u> | 82  | 22  | 49  | 11  | 163 | 163 | 160 | 164 |
|    |   |   |   |   |   |   | <u>GGCC</u> | <u>GGCC</u> | <u>GGCC</u> |     |     |     |     |     |     |     |     |
| h3 | - | - | - | - | - | - | <u>CCGG</u> | <u>CCGG</u> | <u>CCGG</u> | 12  | 8   | 15  | 7   | 34  | 5   | 8   | 7   |
|    |   |   |   |   |   |   | <u>GGCC</u> | <u>GGCC</u> | <u>GGCC</u> |     |     |     |     |     |     |     |     |
| h4 | + | + | + | + | + | + | CCGG        | CCGG        | CCGG        | 933 | 981 | 839 | 890 | 886 | 898 | 876 | 897 |

|                                                         |   |   |   |   |   |   |             |             |             |       |       |       |       |      |      |      |      |
|---------------------------------------------------------|---|---|---|---|---|---|-------------|-------------|-------------|-------|-------|-------|-------|------|------|------|------|
|                                                         |   |   |   |   |   |   | GGCC        | GGCC        | GGCC        |       |       |       |       |      |      |      |      |
| i1                                                      | - | + | - | + | + | - | <u>CCGG</u> | <u>CCGG</u> | <u>CCGG</u> | 1     | 0     | 0     | 0     | 0    | 0    | 0    | 0    |
|                                                         |   |   |   |   |   |   | <u>GGCC</u> | <u>GGCC</u> | <u>GGCC</u> |       |       |       |       |      |      |      |      |
| i2                                                      | - | + | - | - | + | - | <u>CCGG</u> | <u>GGCC</u> | <u>CCGG</u> | 0     | 0     | 1     | 0     | 0    | 0    | 0    | 0    |
|                                                         |   |   |   |   |   |   | <u>GGCC</u> | <u>CCGG</u> | <u>GGCC</u> |       |       |       |       |      |      |      |      |
| i3                                                      | + | - | - | - | - | + | <u>CCGG</u> | <u>GGCC</u> | <u>CCGG</u> | 0     | 0     | 1     | 0     | 0    | 0    | 0    | 0    |
|                                                         |   |   |   |   |   |   | <u>GGCC</u> | <u>CCGG</u> | <u>GGCC</u> |       |       |       |       |      |      |      |      |
| i4                                                      | + | - | - | + | - | - | <u>CCGG</u> | <u>CCGG</u> | <u>CCGG</u> | 0     | 2     | 0     | 0     | 0    | 0    | 0    | 0    |
|                                                         |   |   |   |   |   |   | <u>GGCC</u> | <u>GGCC</u> | <u>GGCC</u> |       |       |       |       |      |      |      |      |
| i5                                                      | + | - | - | + | + | - | <u>CCGG</u> | <u>CCGG</u> | <u>CCGG</u> | 0     | 1     | 0     | 0     | 0    | 0    | 0    | 0    |
|                                                         |   |   |   |   |   |   | <u>GGCC</u> | <u>GGCC</u> | <u>GGCC</u> |       |       |       |       |      |      |      |      |
| i6                                                      | - | - | + | - | - | + | <u>CCGG</u> | <u>CCGG</u> | <u>CCGG</u> | 1     | 0     | 0     | 1     | 0    | 0    | 1    | 0    |
|                                                         |   |   |   |   |   |   | <u>GGCC</u> | <u>GGCC</u> | <u>GGCC</u> |       |       |       |       |      |      |      |      |
| i7                                                      | - | - | - | + | + | + | <u>CCGG</u> | <u>CCGG</u> | <u>CCGG</u> | 0     | 1     | 0     | 1     | 0    | 0    | 0    | 0    |
|                                                         |   |   |   |   |   |   | <u>GGCC</u> | <u>GGCC</u> | <u>GGCC</u> |       |       |       |       |      |      |      |      |
| i8                                                      | + | + | - | + | - | - | <u>CCGG</u> | <u>CCGG</u> | <u>CCGG</u> | 0     | 1     | 1     | 0     | 0    | 0    | 0    | 0    |
|                                                         |   |   |   |   |   |   | <u>GGCC</u> | <u>GGCC</u> | <u>GGCC</u> |       |       |       |       |      |      |      |      |
| i9                                                      | + | + | + | - | - | - | <u>CCGG</u> | <u>CCGG</u> | <u>CCGG</u> | 0     | 0     | 0     | 0     | 0    | 0    | 1    | 0    |
|                                                         |   |   |   |   |   |   | <u>GGCC</u> | <u>GGCC</u> | <u>GGCC</u> |       |       |       |       |      |      |      |      |
| Total amplified bands                                   |   |   |   |   |   |   |             |             |             | 1211  | 1211  | 1080  | 1080  | 1177 | 1156 | 1177 | 1156 |
| Total polymorphic bands induced by drought and recovery |   |   |   |   |   |   |             |             |             | 163   | 191   | 158   | 162   | 18   | 16   | 55   | 14   |
| Polymorphism (%)                                        |   |   |   |   |   |   |             |             |             | 13.46 | 15.77 | 14.63 | 15.00 | 1.53 | 1.38 | 4.67 | 1.21 |

|                                                        |       |       |       |       |       |       |       |       |
|--------------------------------------------------------|-------|-------|-------|-------|-------|-------|-------|-------|
| Demethylated bands induced by drought (a+b+c)          | 102   | 113   | 101   | 109   | 6     | 8     | 31    | 9     |
| (a+b+c/Total)%                                         | 62.58 | 59.16 | 63.92 | 67.28 | 33.33 | 50.00 | 56.36 | 64.29 |
| Methylated bands induced by drought (d+e+f)            | 22    | 45    | 23    | 25    | 5     | 5     | 21    | 4     |
| (d+e+f/Total) %                                        | 13.50 | 23.56 | 14.56 | 15.43 | 27.78 | 31.25 | 38.18 | 28.57 |
| Bands methylated only under recovery (g1,g2,g3)        | 7     | 5     | 3     | 3     | 1     | 0     | 0     | 1     |
| Bands demethylated only under recovery (g4,g5,g6,g7g8) | 30    | 23    | 28    | 23    | 6     | 3     | 1     | 0     |
| g class bands                                          | 37    | 28    | 31    | 26    | 7     | 3     | 1     | 1     |
| (g/Total) %                                            | 22.70 | 14.66 | 19.62 | 16.05 | 38.89 | 18.75 | 1.81  | 7.14  |

Note: “+” and “-“ indicate present and absent band respectively; H and M indicated *EcoR I/Hpa II* and *EcoR I/Msp I* lane respectively; C indicates methylated cytosine.

a: demethylated by drought stress, but recovered by subsequent rewatering

b: demethylated by drought stress, and still hypomethylated under recovery

c: demethylated by drought stress, but remethylated with different pattern under recovery

d: methylated by drought stress, but demethylated by subsequent rewatering

e: methylated by drought stress, and still methylated under recovery

f: methylated by drought stress, but demethylated with different pattern under recovery

g: DNA methylation pattern was not changed under drought, but induced by recovery

h: DNA methylation pattern was not changed under three conditions

i: Others
